# Supplementary material for: A stepwise oxidation strategy for the synthesis of amorphous V2O5@V2CTxnanohybrid cathodes toward high-performance aqueous Zn-ion batteries
Source: Royal Society of Chemistry journal article supplement (doi:10.1039/d2ta09979a), 2023-01-01
Supplement: d2ta09979a1.pdf [file d2ta09979a1.pdf]

## Supporting Information

### **Stepwise oxidation strategy for the synthesis of amorphous $V_2O_5@V_2CT_x$ nanohybrid cathodes toward high-performance aqueous Zn-ion batteries**

Weiwei, Wang,<sup>a</sup> Ruiting Hu,<sup>a</sup> Chi Zhang,<sup>a</sup> Yu Tao,<sup>a</sup> Ling Ran,<sup>a</sup> Yani Li,<sup>a</sup> Yao, Ouyang,<sup>d</sup> and Jun, Yan

\*<sup>a b c</sup>

<sup>a</sup> *College of Chemistry and Chemical Engineering, Central South University, Changsha 410083, Hunan, P. R. China.*

<sup>b</sup> *Hunan Provincial Key Laboratory of Efficient and Clean Utilization of Manganese Resources, Changsha 410083, Hunan, P. R. China.*

<sup>c</sup> *Hunan Provincial Key Laboratory of Chemical Power Sources, Changsha 410083, Hunan, P. R. China.*

<sup>d</sup> *Chang Jun High School of Changsha, Changsha 410083, Hunan, P. R. China.*

## First-Principle DFT Calculations

All computations are carried out in the framework of density generalized function theory, using a projector augmented plane-wave approach, implemented in the Vienna Vienna *ab-initio* simulation package [1]. The generalized gradient approximation proposed by Perdew, Burke, and Ernzerhof was chosen as the exchange-correlation potential [2]. The plane wave cut-off energy was set to 450 eV. The energy criterion was set as  $10^{-5}$  eV in iterative solution of the Kohn-Sham equation. The Brillouin zone integration was performed using a  $3\times 3\times 3$   $k$ -mesh for  $\text{VO}_2$   $2\times 2\times 2$  supercell,  $5\times 5\times 3$   $k$ -mesh for  $\text{Zn}_3\text{OH}_2\text{V}_2\text{O}_7$  and  $\text{Zn}_3\text{OH}_2\text{V}_2\text{O}_7\cdot 2\text{H}_2\text{O}$ , and  $3\times 3\times 3$   $k$ -mesh for the amorphous  $\text{V}_2\text{O}_5$   $2\times 2\times 2$  supercell, which is obtained through the AIMD method we have used the NVT ensemble with a timestep of 1 fs for 3000 fs at 1250 K. All the structures were relaxed until the residual forces on the atoms have declined to less than  $0.02$  eV/Å. Zn ion diffusion barriers and transition states in  $\text{VO}_2$   $2\times 2\times 2$  supercell,  $\text{Zn}_3\text{OH}_2\text{V}_2\text{O}_7$ ,  $\text{Zn}_3\text{OH}_2\text{V}_2\text{O}_7\cdot 2\text{H}_2\text{O}$  and  $\text{V}_2\text{O}_5$   $2\times 2\times 2$  was determined using the climbing image nudged elastic band (CINEB) method [3, 4]. All calculations of this work were performed through the MedeA VASP 6.

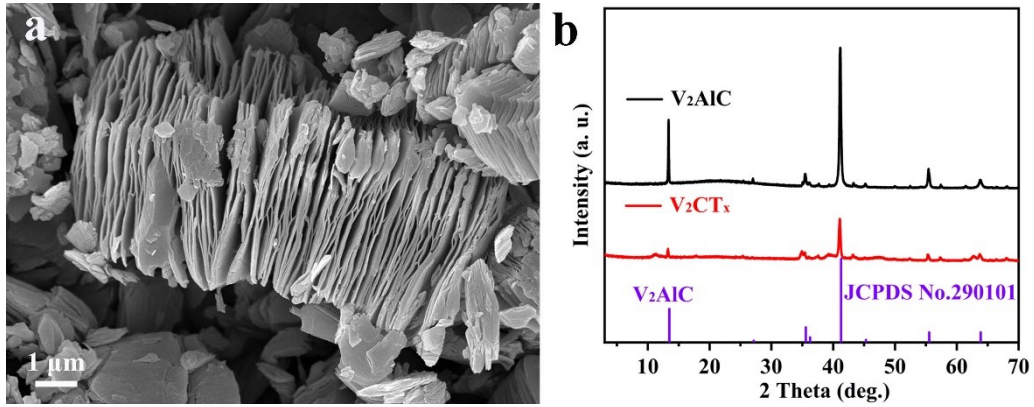

**Figure S1.** (a) SEM image and (b) XRD pattern of  $V_2CT_x$ .

The weak diffraction peaks located at around  $11.2^\circ$  appeared after chemical etching, which is assigned to the (002) plane of  $V_2CT_x$  MXene. Importantly, the position of this peak tends to shift slightly depending on the amount of enclosed water intercalated between the MXene layers, which in turn may change with different synthesis conditions. The small peaks of  $13.5^\circ$  and  $41.5^\circ$  around  $2\theta$  indicate the presence of a small amount of unreacted crystalline  $V_2AIC$  MAX phase (JCPDS No. 290101). This small amount of unreacted MAX phase appears in almost all MXenes synthesized by HF etching, and due to its more ordered structure compared to the produced MXene, its XRD peak is relatively sharp. In addition, SEM shows the formation of the typical accordion-like multilayered MXene structure of  $V_2CT_x$ .

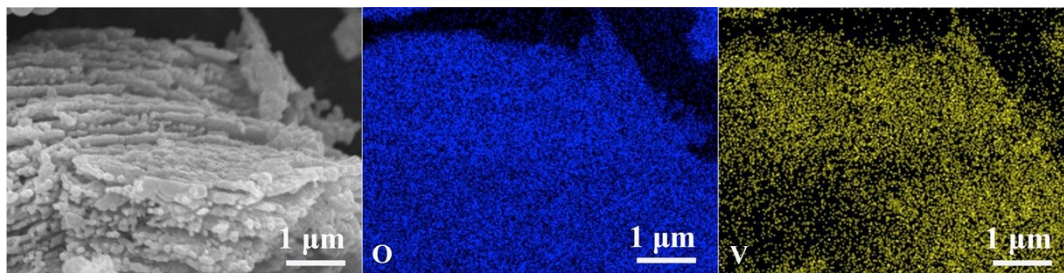

**Figure S2.** SEM elemental mapping images of the VO<sub>2</sub>(M)@V<sub>2</sub>CT<sub>x</sub>-600 materials

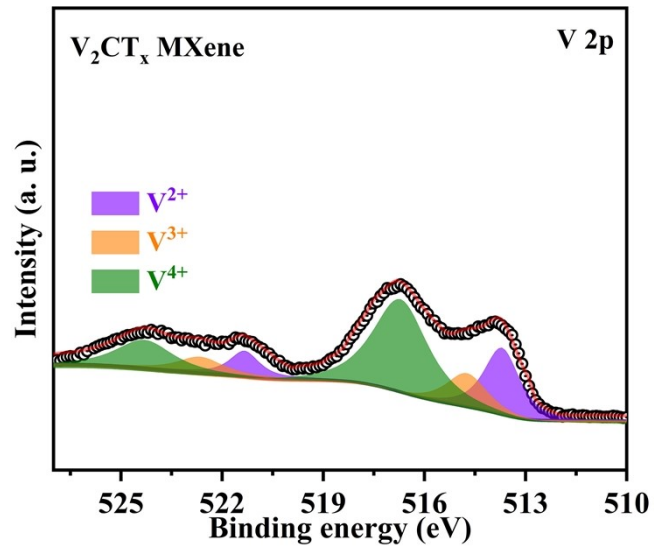

Figure S3. V 2p spectrum of  $V_2CT_x$  MXene.

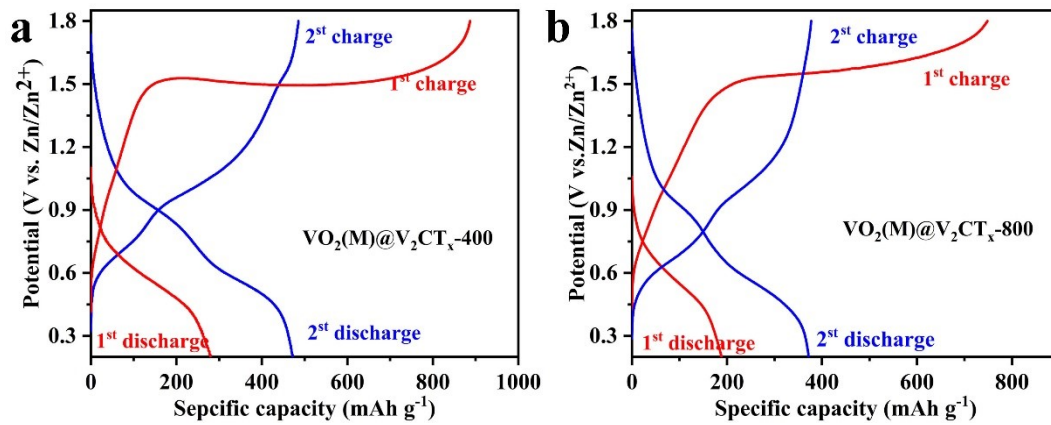

**Figure S4.** GCD curves of (a) the VO<sub>2</sub>(M)@V<sub>2</sub>CT<sub>x</sub>-400 and (b) VO<sub>2</sub>(M)@V<sub>2</sub>CT<sub>x</sub>-800 electrodes in the 1 cycle and 2nd cycle.

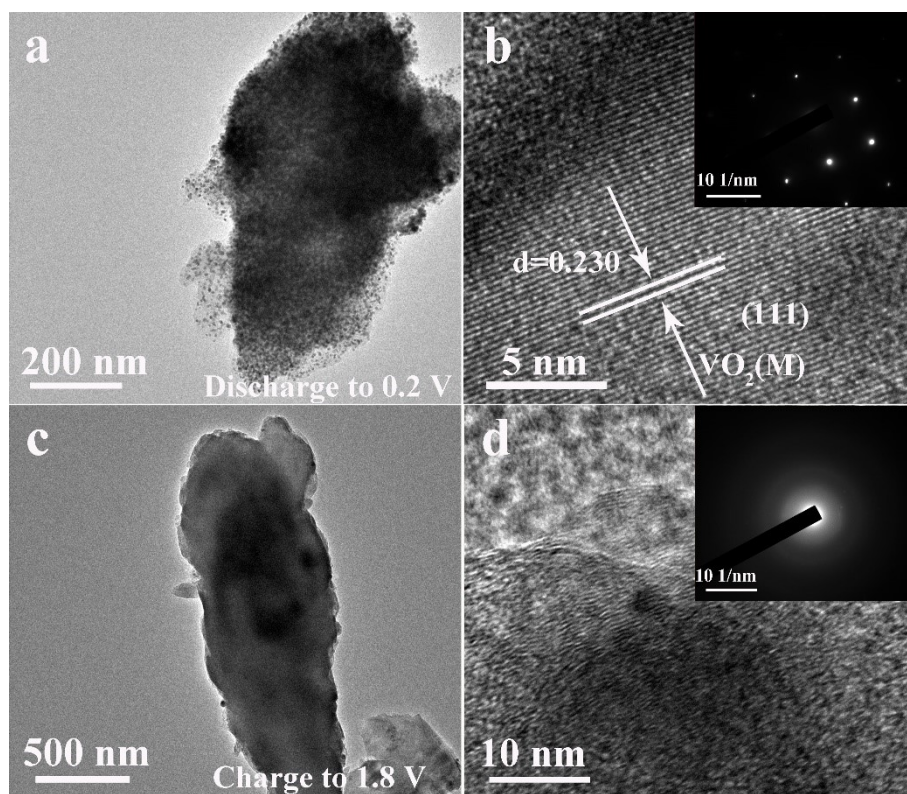

Figure S5. TEM analysis of  $\text{VO}_2(\text{M})@V_2\text{CT}_x-600$  cathode at selected voltage.

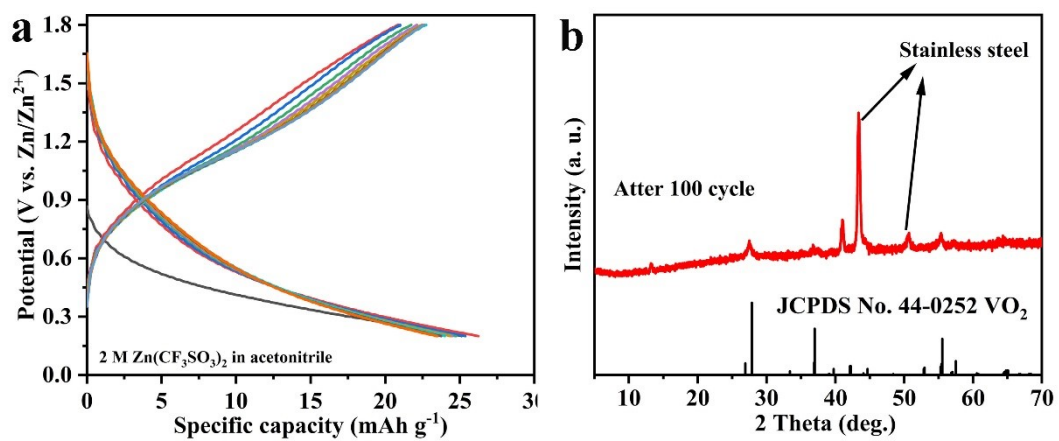

**Figure S6.** (a) GCD curves and (b) XRD pattern of the VO<sub>2</sub>(M)@V<sub>2</sub>CT<sub>x</sub>-600 electrode in 2 M Zn(CF<sub>3</sub>SO<sub>3</sub>)<sub>2</sub> in acetonitrile.



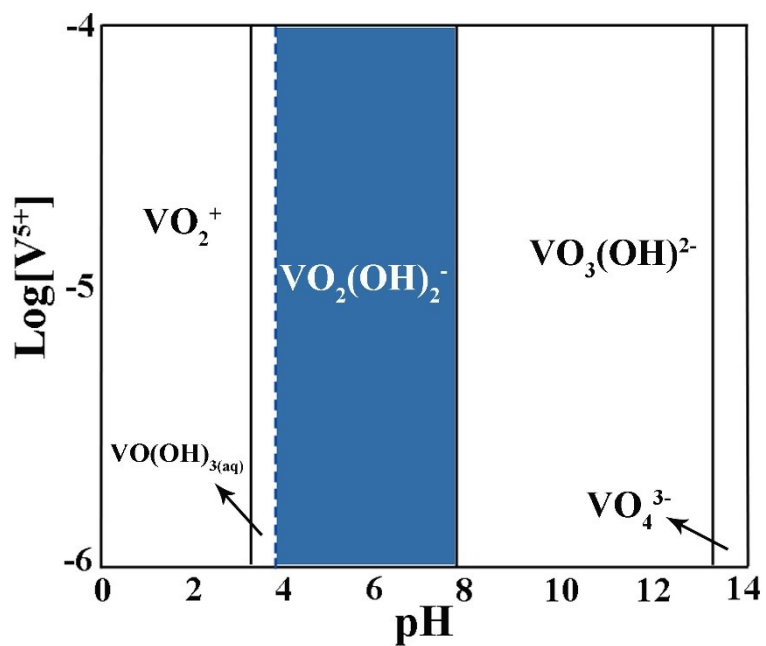

**Figure S7.** Predominant V<sup>5+</sup> species in aqueous solutions at 25 °C as a function of vanadium concentration ([V<sup>5+</sup>]) and pH.<sup>5</sup>

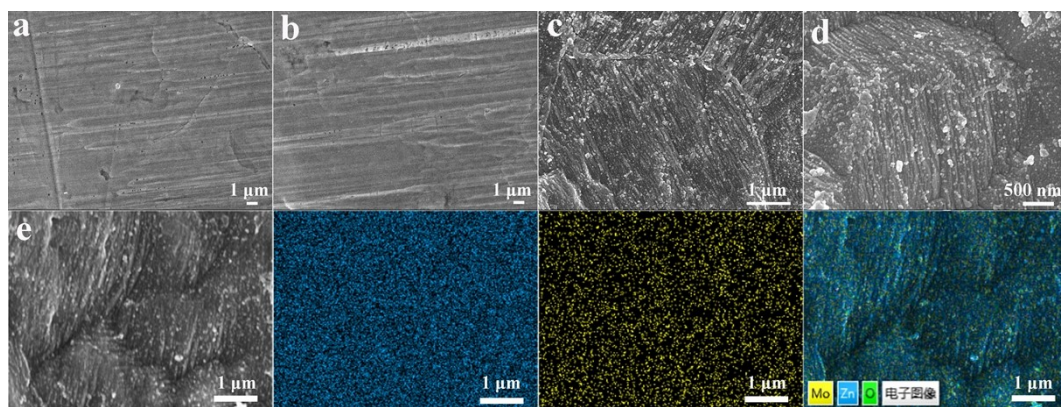

**Figure S8.** (a, b) SEM images of the bare Zn. (c, d) SEM images and corresponding element mapping of Zn@ZnMoO<sub>4</sub>.

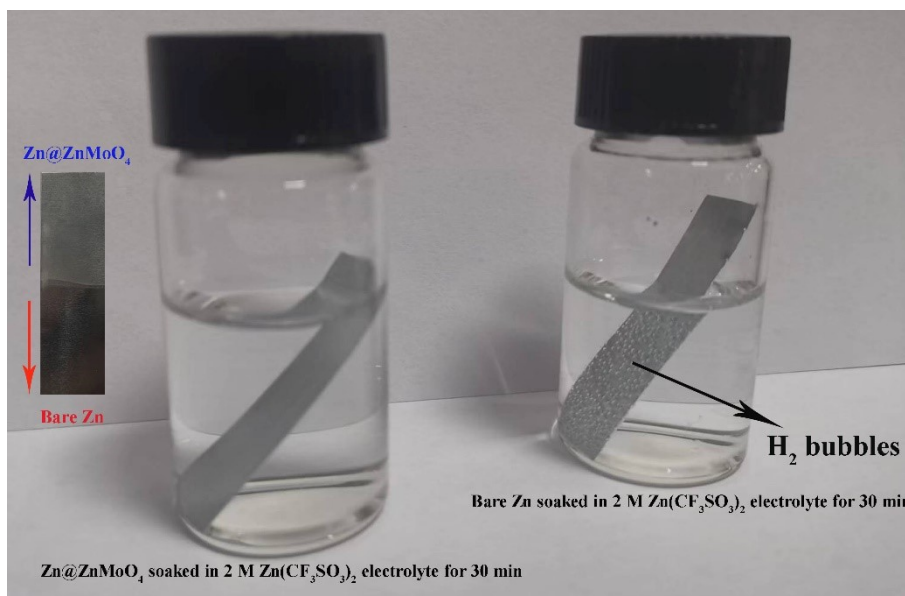

**Figure S9.** Digital photographs of Zn@ZnMo<sub>4</sub> and bare Zn immersed in 2M Zn(CF<sub>3</sub>SO<sub>3</sub>)<sub>2</sub> electrolyte.

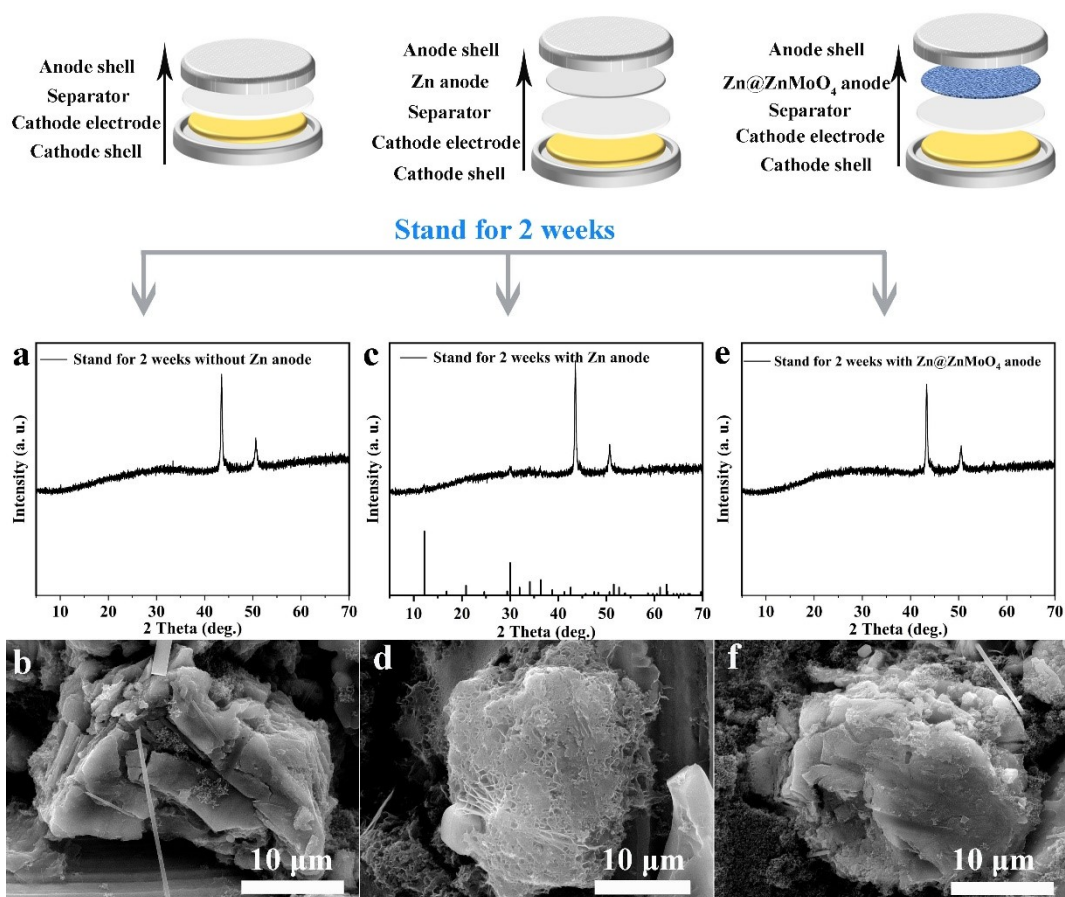

**Figure S10.** Sketches of the cell models of a-V<sub>2</sub>O<sub>5</sub>@V<sub>2</sub>CT<sub>x</sub>//without Zn anode, amorphous V<sub>2</sub>O<sub>5</sub>@V<sub>2</sub>CT<sub>x</sub>//with Zn anode and the amorphous V<sub>2</sub>O<sub>5</sub>@ V<sub>2</sub>CT<sub>x</sub>// with Zn@ZnMoO<sub>4</sub> anode batteries and their corresponding XRD pattern and SEM image after 2 weeks of standing.

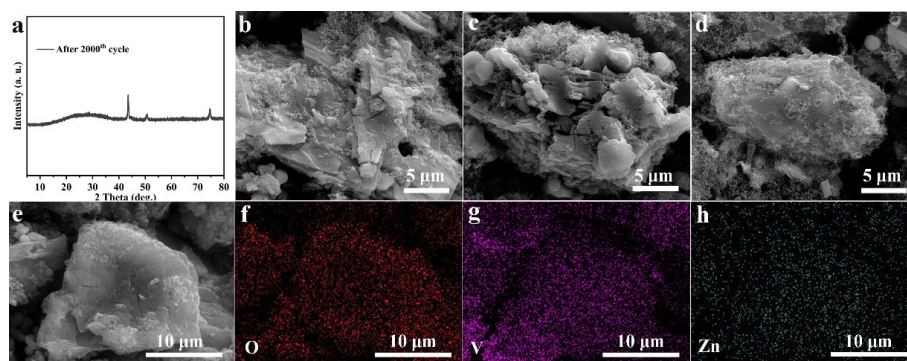

**Figure S11.** (a) XRD pattern, (b-d) SEM images, and (e-h) SEM element mapping of the amorphous  $V_2O_5@V_2CT_x$  cathode after 2000<sup>th</sup> cycle.

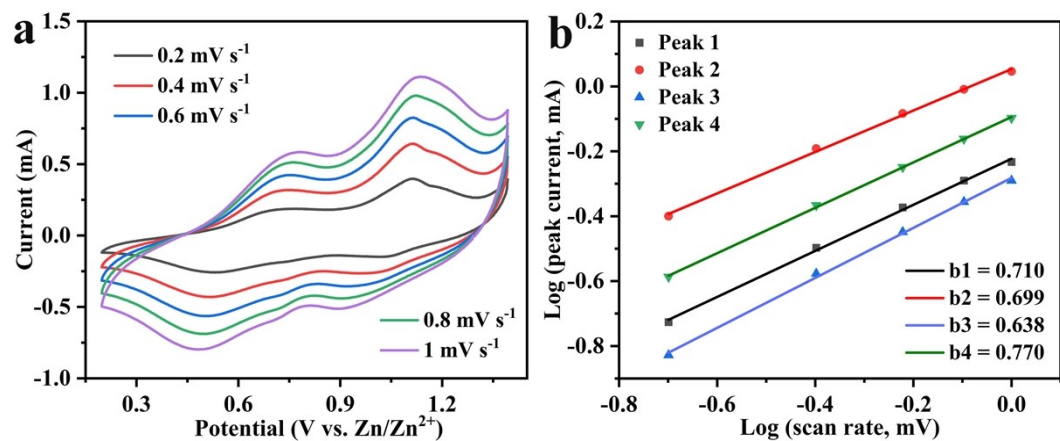

**Figure S12.** (a) CV curves, and (b) relationship between the logarithm of peak current and logarithm of scan rate of the  $\text{VO}_2(\text{M})@V_2\text{CT}_x-600$ .

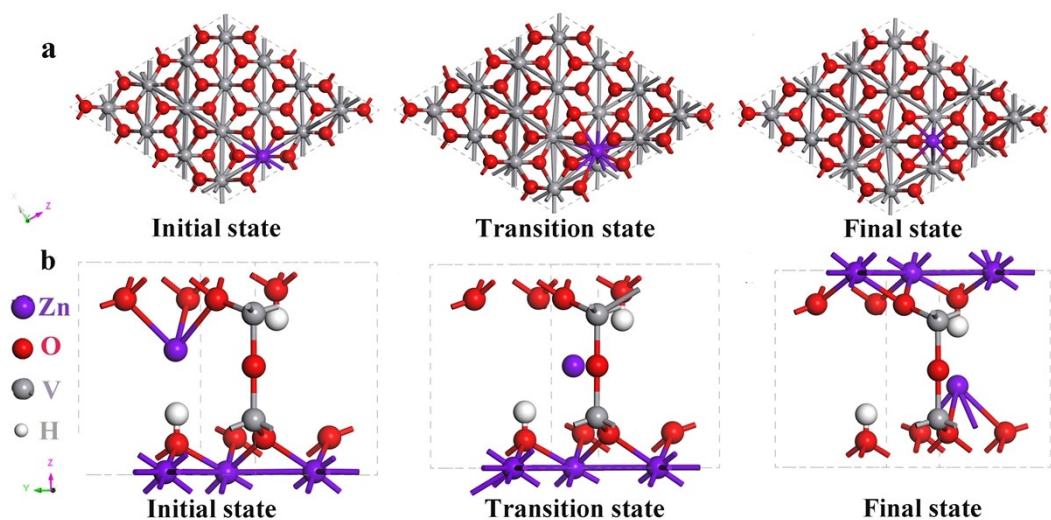

**Figure S13.** (a, b) initial state, transition state and final state of immigration path of Zn in  $\text{VO}_2(\text{M})$  and  $\text{Zn}_3\text{OH}_2\text{V}_2\text{O}_7$ , respectively.

In the ZVO crystal structure, Zn atoms occupy the octahedral sites in a close-packed layer of O atoms; thus, Zn atoms in the layers are difficult to move. Although the  $[\text{ZnO}_6]$  layers are connected by pyrovanadate groups and forms an open framework, it exhibits much higher  $\text{Zn}^{2+}$  diffusion barriers than those of  $\text{VO}_2(\text{M})$  and amorphous  $\text{V}_2\text{O}_5$ .

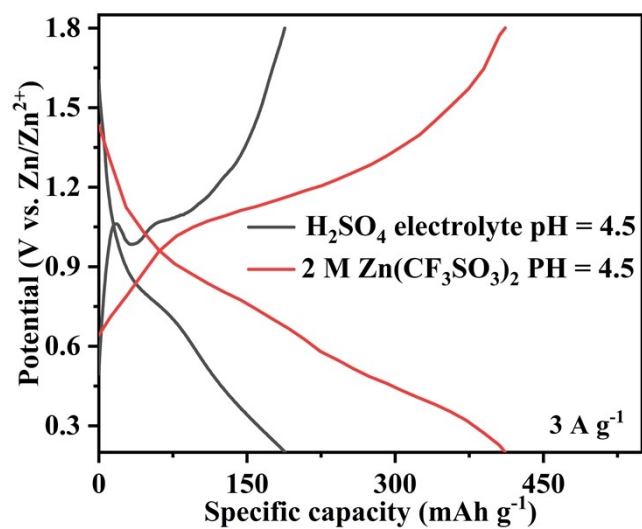

**Figure S14.** GCD curves of the amorphous V<sub>2</sub>O<sub>5</sub>@V<sub>2</sub>CT<sub>x</sub> cathode at 3 A g<sup>-1</sup> in H<sub>2</sub>SO<sub>4</sub> and Zn(CF<sub>3</sub>SO<sub>3</sub>)<sub>2</sub> electrolyte.



**Table S1.** Electrochemical performance comparisons of the amorphous  $V_2O_5@V_2CT_x$  with the recently reported Zn-ion battery cathodes.

| Cathode                                            | Potential window | Specific capacity                   | Rate capacity                      | Cycling performance                                                       | Ref.                                       |
|----------------------------------------------------|------------------|-------------------------------------|------------------------------------|---------------------------------------------------------------------------|--------------------------------------------|
| Amorphous $V_2O_5@V_2CT_x$                         | 0.2-1.8 V        | 651 mA h $g^{-1}$ at 0.1 A $g^{-1}$ | 302 mA h $g^{-1}$ at 20 A $g^{-1}$ | 405 mA h $g^{-1}$ at 2 A $g^{-1}$ after 2000 cycles.<br>(93% retention)   | <b>This work</b>                           |
| Amorphous $V_2O_5$ /Graphene                       | 0.2-1.8 V        | 489 mA h $g^{-1}$ at 0.1 A $g^{-1}$ | 237 mA h $g^{-1}$ at 20 A $g^{-1}$ | 240 mA h $g^{-1}$ at 30 A $g^{-1}$ after 3000 cycles.<br>(87% retention)  | Adv. Energy Mater. 2020, 2000081           |
| N-doped $KMn_8O_{16}$ with abundant oxygen vacancy | 0.8-1.8 V        | 298 mA h $g^{-1}$ at 0.1 A $g^{-1}$ | 106 mA h $g^{-1}$ at 10 A $g^{-1}$ | 262 mA h $g^{-1}$ at 1 A $g^{-1}$ after 2500 cycles.<br>(91% retention)   | Adv. Sci. 2022, 9, 2106067                 |
| CuMn-PBA                                           | 0.45-1.8 V       | 108 mA h $g^{-1}$ at 0.1 A $g^{-1}$ | 52 mA h $g^{-1}$ at 2 A $g^{-1}$   | 104 mA h $g^{-1}$ at 1 A $g^{-1}$ after 2000 cycles.<br>(96.8% retention) | Angew. Chem. Int. Ed. 2022, 61, e202212031 |
| CNT-CaMO                                           | 1-1.8 V          | 366 mA h $g^{-1}$ at 0.1 A $g^{-1}$ | 104 mA h $g^{-1}$ at 2 A $g^{-1}$  | no obvious capacity fading during 6000 cycles at 3 A $g^{-1}$ .           | Dalton Trans., 2022, 51, 9477–9485         |
| d-VOH@CT                                           | 0.2-1.6 V        | 386 mA h $g^{-1}$ at 0.2 A $g^{-1}$ | 168 mA h $g^{-1}$ at 10 A $g^{-1}$ | 194 mA h $g^{-1}$ at 5 A $g^{-1}$ after 2000 cycles.<br>(89% retention)   | J. Mater. Chem. A, 2022, 10, 13428–13438   |

|                                                      |           |                                             |                                            |                                                                                     |                                                |
|------------------------------------------------------|-----------|---------------------------------------------|--------------------------------------------|-------------------------------------------------------------------------------------|------------------------------------------------|
| Amorphous<br>$V_2O_5@Ti_3C_2T_x$                     | 0.2-1.8 V | 544 mA h<br>$g^{-1}$ at 0.5<br>A $g^{-1}$   | 144 mA h<br>$g^{-1}$ at 30 A<br>$g^{-1}$   | 135 mA h $g^{-1}$ at<br>30 A $g^{-1}$ after<br>1000 cycles.                         | J. Power<br>Sources, 2022,<br>544, 231883      |
| $Mn^{2+}$ -intercalated<br>$V_{10}O_{24}\cdot nH_2O$ | 0.2-1.6 V | 403 mA h<br>$g^{-1}$ at 0.5<br>A $g^{-1}$   | 235.5 mA<br>h $g^{-1}$ at 22<br>A $g^{-1}$ | 287.6 mA h $g^{-1}$ at<br>10 A $g^{-1}$ after<br>25000 cycles.<br>(92.9% retention) | Energy Stor.<br>Materials, 2022,<br>45 568-577 |
| Activated $V_2CT_x$                                  | 0.2-1.8 V | 386 mA h<br>$g^{-1}$ at 1 A<br>$g^{-1}$     | 358 mA h<br>$g^{-1}$ at 30 A<br>$g^{-1}$   | 283.7 mA h $g^{-1}$ at<br>30 A $g^{-1}$ after<br>2000 cycles.<br>(79.2% retention)  | Adv. Funct.<br>Mater. 2021,<br>31, 2008033     |
| $VSe_2@V_2CT_x$                                      | 0.1-1.6 V | 302 mA h<br>$g^{-1}$ at 0.1<br>A $g^{-1}$   | 132 mA h<br>$g^{-1}$ at 2 A<br>$g^{-1}$    | 158 mA h $g^{-1}$ at 2<br>A $g^{-1}$ after 600<br>cycles.<br>(93.1% retention)      | ACS Nano 2022,<br>16, 2711–2720                |
| $VS_2/MXene$                                         | 0.2-1.2 V | 213.4 mA<br>h $g^{-1}$ at<br>0.2 A $g^{-1}$ | 208.7 mA<br>h $g^{-1}$ at 5<br>A $g^{-1}$  | 195 mA h $g^{-1}$ at 5<br>A $g^{-1}$ after 2400<br>cycles.<br>(93.4% retention)     | J. Power<br>Sources, 2022,<br>545, 231944      |

---

## References

- 1 G. Kresse, D. Joubert, *Phy. Revi. B* 1999, **59**, 1758-1775.
- 2 J.P. Perdew, K. Burke, M. Ernzerhof, *Phy. Rev. Lett.* 1996, **77**, 3865-3868.
- 3 G. Henkelman, B. P. Uberuaga; H. Jónsson, *J. Chem. Phys.* 2000, **113**, 9901-9904.
- 4 G. Mills, H. Jónsson, G.K. Schenter, *Surf. Sci.* 1995, **324**, 305-337.
- 5 Y. Kim, Y. Park, M. Kim, J. Lee, K.J. Kim, J.W. Choi, *Nat. Commun.* 2022, **13**, 2371.
